# Supplementary material for: Sit-up Test for Assessing Blood Pressure Dysregulation in Community-Dwelling Older Adults: A Cross-Sectional Study
Source: Research Square preprint supplement (doi:10.21203/rs.3.rs-5994734/v1), 2025-02-19
Supplement: Supplementary file 1 [file 4326877461cf5c37069899d8.pdf]

### Additional File 3

**Supplementary Table 3. Subgroup analyses of participants with orthostatic hypotension**

| Variable                    | Isolated OH<br>(n = 16) | OH with<br>supine HT<br>(n = 9) | OH with<br>supine HT and<br>seated HT<br>(n = 9) | Overall<br>p-value |
|-----------------------------|-------------------------|---------------------------------|--------------------------------------------------|--------------------|
| <b>Demographic outcomes</b> |                         |                                 |                                                  |                    |
| Height, m                   | 1.60 ± 0.12             | 1.60 ± 0.08                     | 1.60 ± 0.10                                      | 0.993              |
| <b>Clinical outcomes</b>    |                         |                                 |                                                  |                    |
| Comorbidities               |                         |                                 |                                                  |                    |
| At least one comorbidity    | 10 (62.5)               | 6 (66.7)                        | 4 (44.4)                                         | 0.669              |
| Articular diseases          | 4 (25.0)                | 2 (22.2)                        | 2 (22.2)                                         | 0.999              |
| Respiratory diseases        | 2 (12.5)                | 2 (22.2)                        | 0 (0.0)                                          | 0.349              |
| <b>Geriatric outcomes</b>   |                         |                                 |                                                  |                    |
| Non-robust                  | 11 (68.8)               | 6 (66.7)                        | 8 (88.9)                                         | 0.607              |
| Shrinking                   | 4 (25.0)                | 3 (33.3)                        | 1 (11.1)                                         | 0.434              |
| Skin autofluorescence, AU   | 2.51 ± 0.35             | 2.39 ± 0.54                     | 2.31 ± 0.31                                      | 0.461              |

Values are presented as means ± standard deviation or numbers (%).

OH, orthostatic hypotension; HT, hypertension; AU, arbitrary units.
