# Supplementary material for: Sit-up Test for Assessing Blood Pressure Dysregulation in Community-Dwelling Older Adults: A Cross-Sectional Study
Source: Research Square preprint supplement (doi:10.21203/rs.3.rs-5994734/v1), 2025-02-19
Supplement: Supplementary file 2 [file 5dec7507d73604412006f5fc.pdf]

## Additional File 2

**Supplementary Table 2. Blood pressure dysregulation status among participants**

| Orthostatic hypotension | Supine hypertension | Seated hypertension | Value     |
|-------------------------|---------------------|---------------------|-----------|
| Positive                | Positive            | Positive            | 9 (8.8)   |
|                         |                     | Negative            | 9 (8.8)   |
|                         | Negative            | Positive            | 0 (0.0)   |
|                         |                     | Negative            | 16 (15.7) |
| Negative                | Positive            | Positive            | 14 (13.7) |
|                         |                     | Negative            | 4 (3.9)   |
|                         | Negative            | Positive            | 10 (9.8)  |
|                         |                     | Negative            | 40 (39.2) |

Values are presented as numbers (%).

Shaded cells indicate that the corresponding blood pressure dysregulation is negative.
